# Supplementary material for: Elemental Concentrations in the Seed of Mutants and Natural Variants of Arabidopsis thaliana Grown under Varying Soil Conditions
Source: PLOS journal article supplement (doi:10.1371/journal.pone.0063014), 2013-05-06
Supplement: S1 (10.1371/journal.pone.0063014.s001) [file journal.pone.0063014.s001]

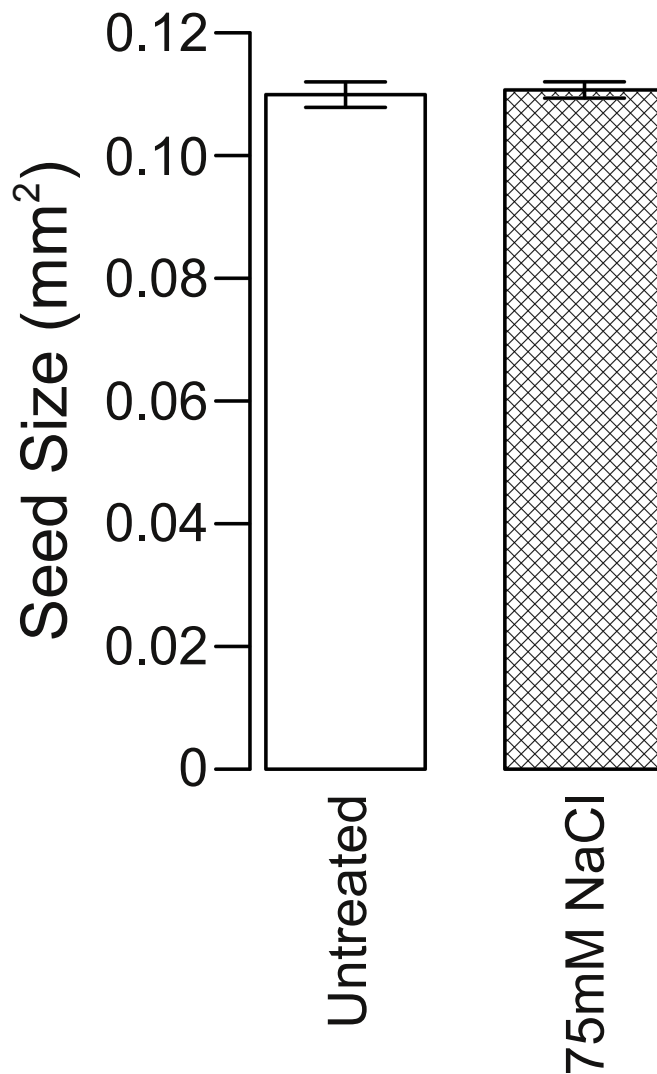

**Figure S1. 75 mM NaCl soil modification does not alter Col-0 seed size.** Average results ( $\pm$ SE) of four independent experiments are presented for untreated (open bars,  $n = 12$  plants) and 75 mM NaCl (crosshatched bars,  $n = 12$  plants) soil conditions. Seed sizes were measured from scanned images as two-dimensional areas using the ImageJ software package. No statistically significant differences were observed between untreated and 75 mM NaCl soil conditions ( $p = 0.7605$ , Welch's t-test).
